# Supplementary material
Source: PubMed Central journal article supplement (PMC9423198)
Supplement: NIHMS802973-supplement-Supplements.pdf [file NIHMS802973-supplement-Supplements.pdf]

## Supplementary Figure S1

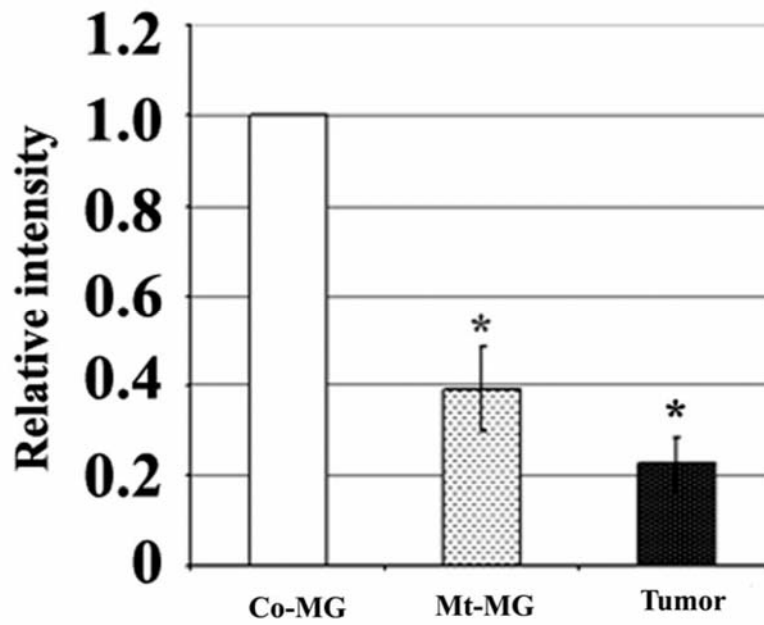

**Figure S1** Quantification of methylation status in terms of 5-methylcytosine staining.

\* represents  $P < 0.05$  of Student's  $t$ -test.

## Supplementary Figure S2

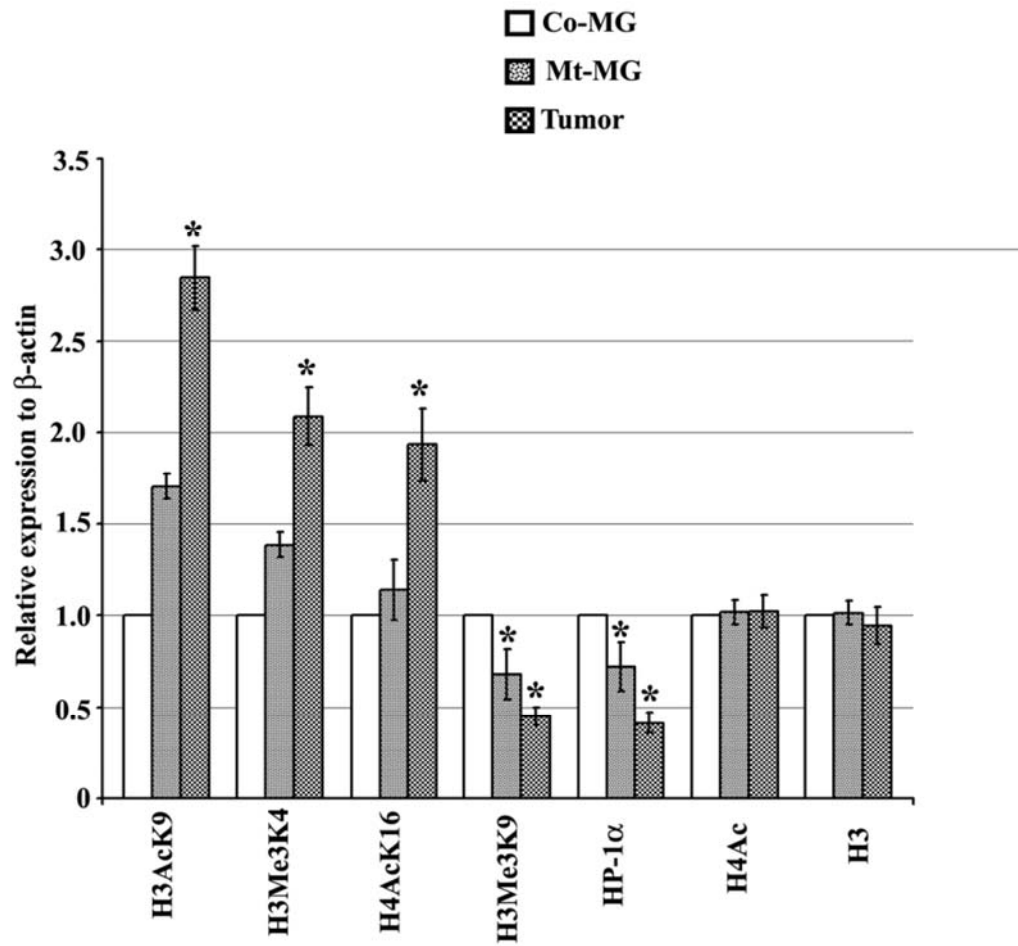

**Figure S2** Quantification of epigenetic modifications in BRCA1 mutant mammary gland and mammary tumors revealed by western blots. \* represents  $P < 0.05$  of Student's  $t$ -test.

### Supplementary Figure S3

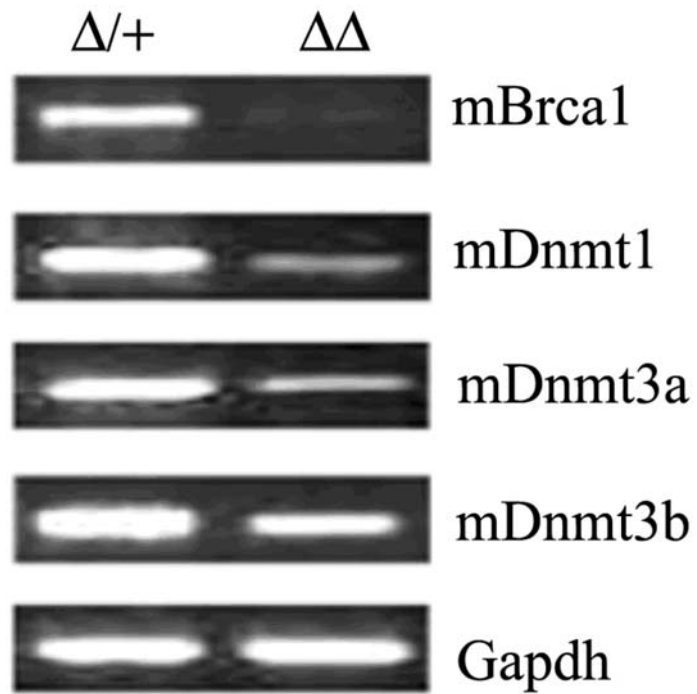

**Figure 3** RT-PCR analysis of BRCA1 and DNMT expression in mouse liver samples (9 months old, Brca1 $\Delta/\Delta$  or  $\Delta/+$ ; p53 +/-).

## Supplementary Figure S4

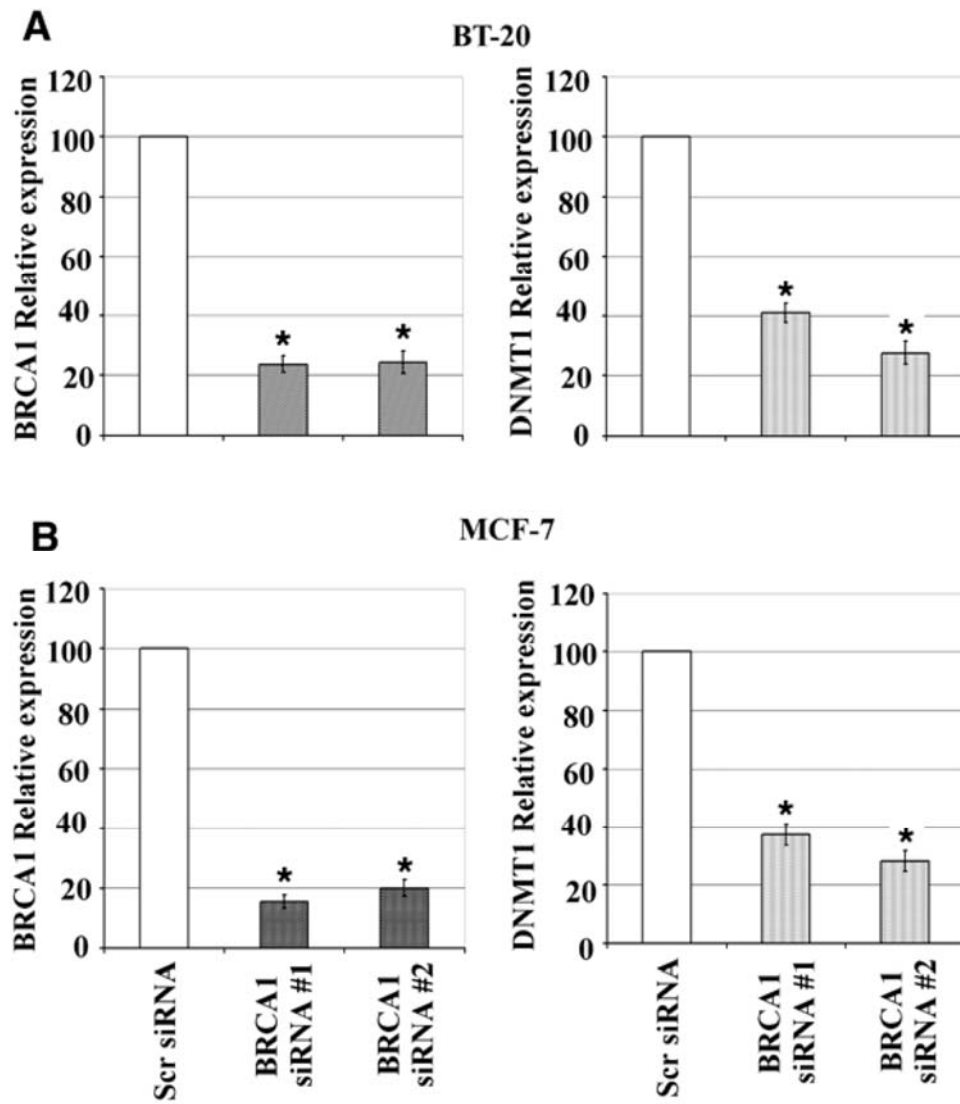

**Figure 4 (A, B)** Real time PCR analysis of *BRCA1* and *DNMT1* expression in human breast cancer BT-20 (**A**) and MCF-7 (**B**) cells.

## Supplementary Figure S5

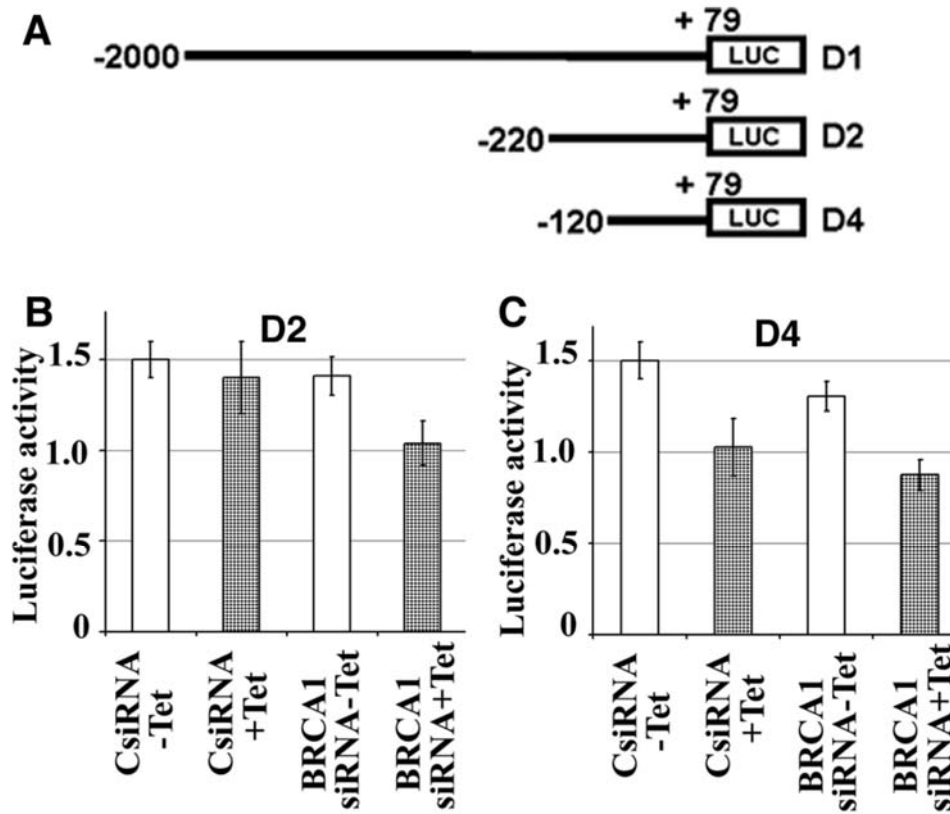

**Figure S5** Luciferase reporter and their activities. (A) Three luciferase reporters for murine *Dnmt1*. (B, C) Luciferase activity of D2 (B) and D4 (C) reporters in Tet regulated UBR-60 cells.

## Supplementary Figure S6

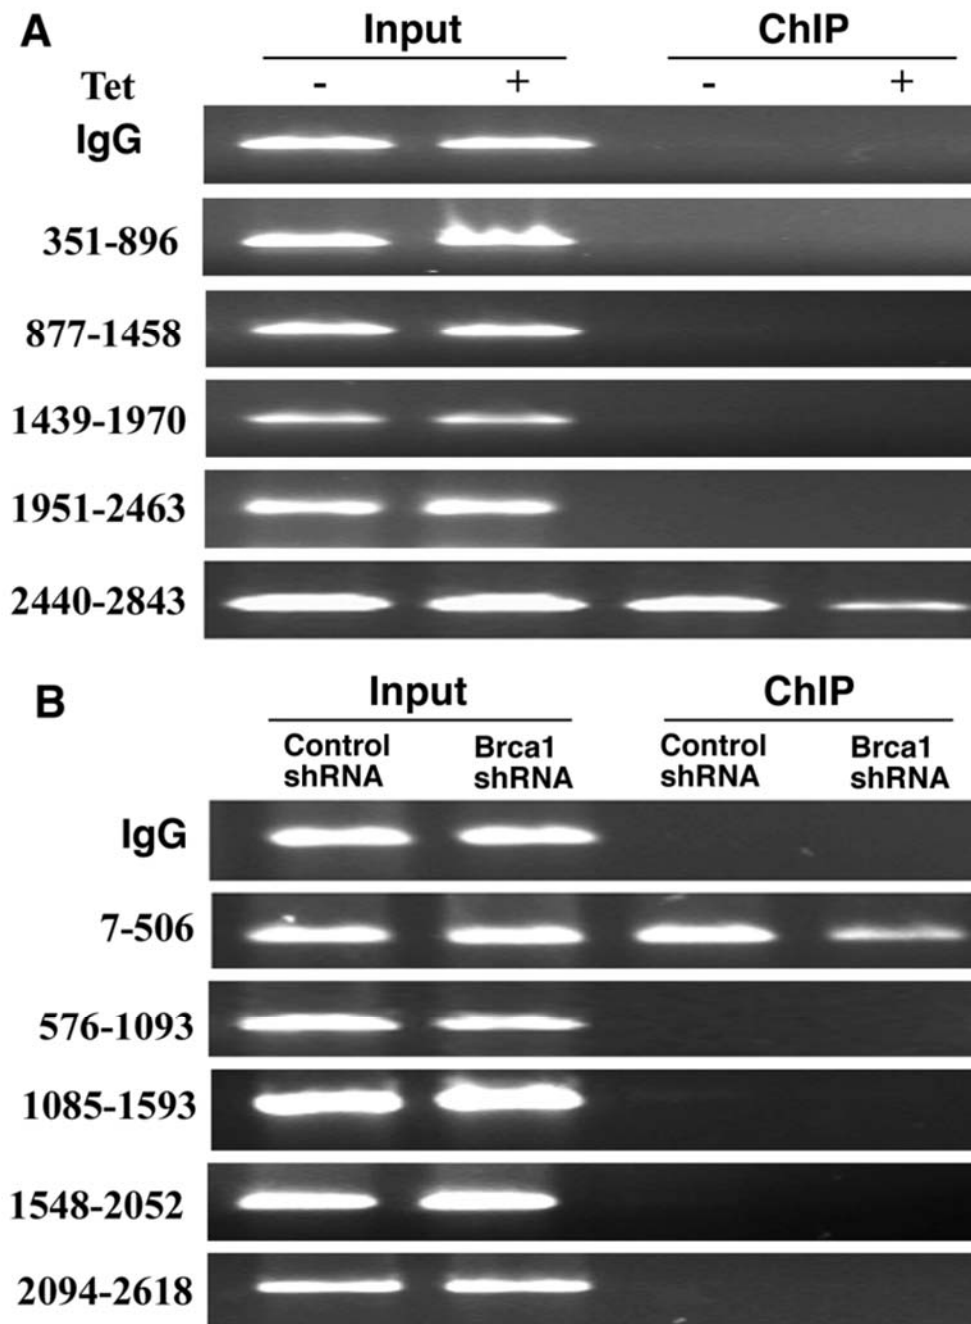

**Figure S6** BRCA1 binds to the promoter of *DNMT1* revealed by ChIP assay. (**A**, **B**) ChIP analysis of human (**A**) and mouse (**B**) promoter showing that a fragment from -2440 to -2843 of human and a fragment from -7 to -506 of mouse *DNMT1* promoter interact with BRCA1.

Supplementary Figure S7

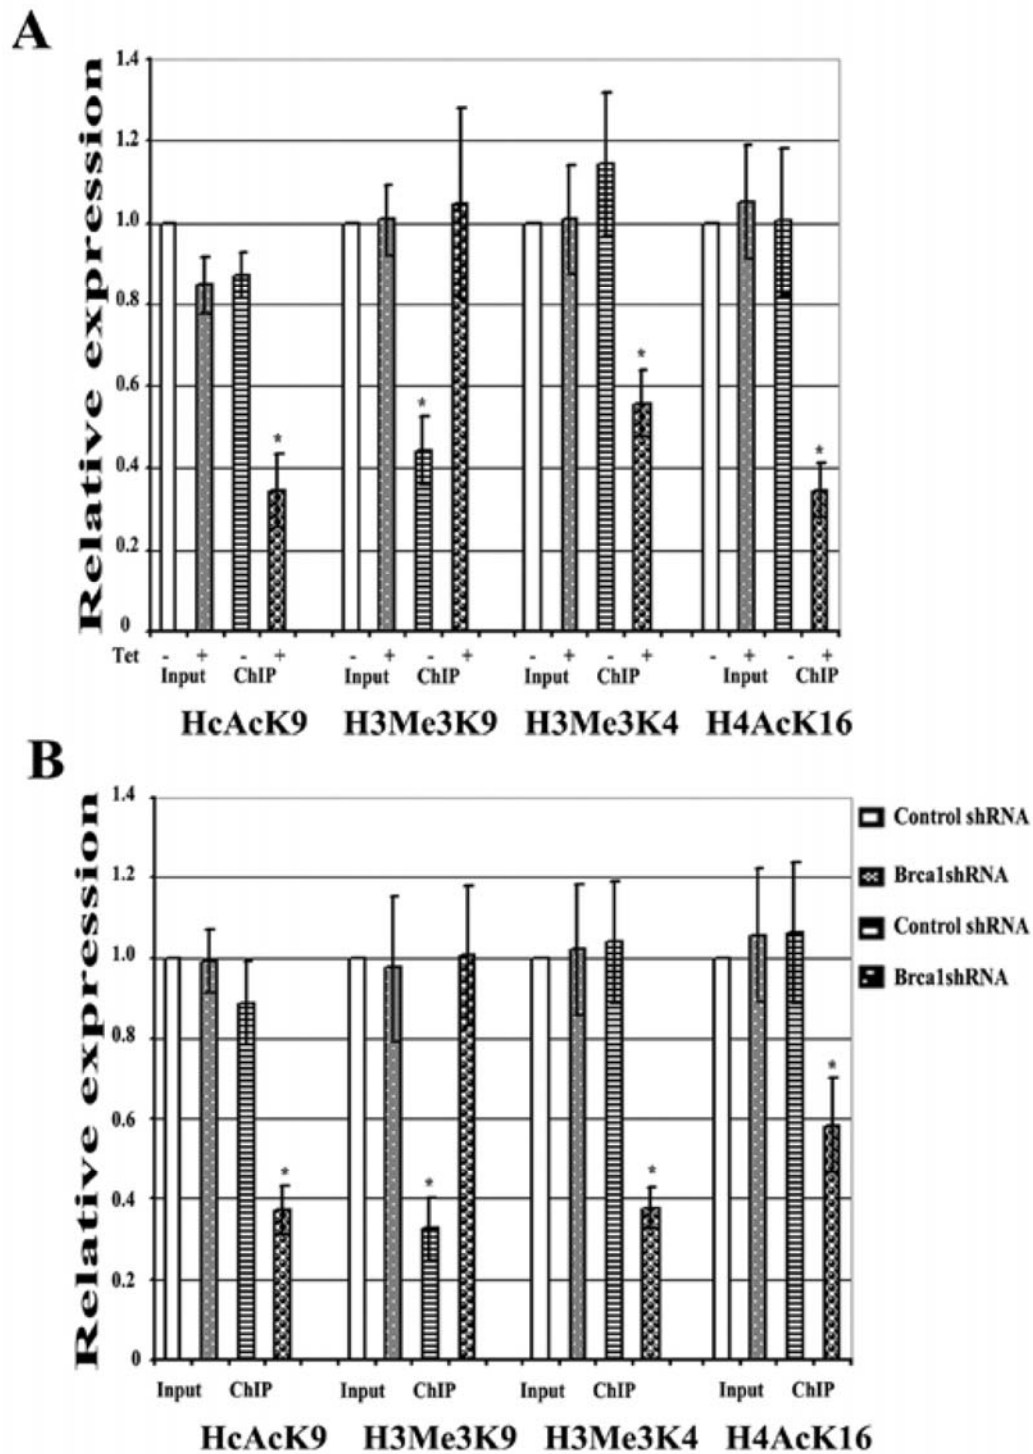

## Supplementary Figure S8

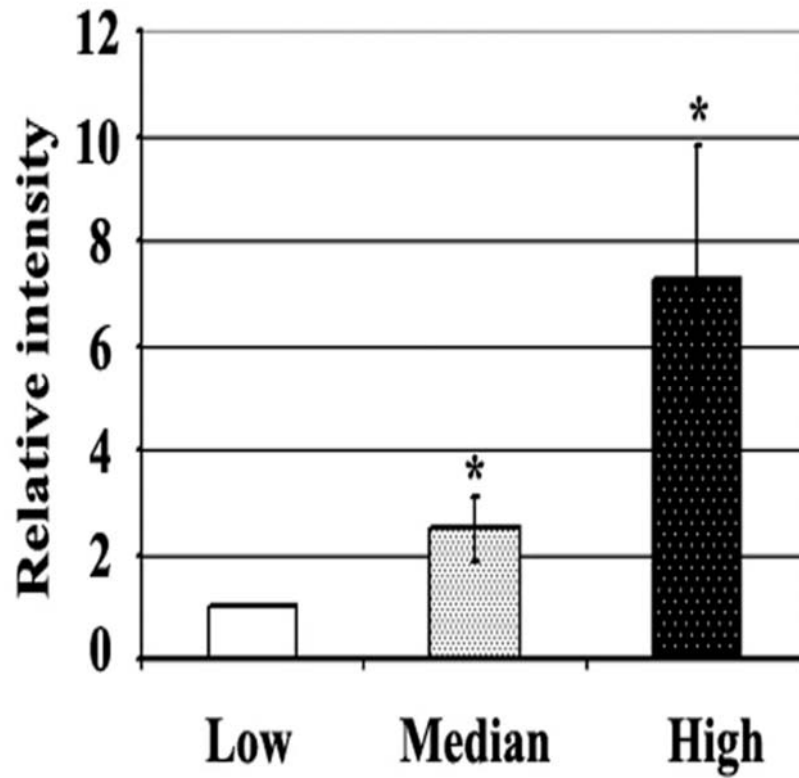

**Figure S8** Quantification of immunofluorescent intensity of 5-methyl cytosine staining. \* represents  $P < 0.05$  of Student's  $t$ -test.



## Supplementary Figure S9

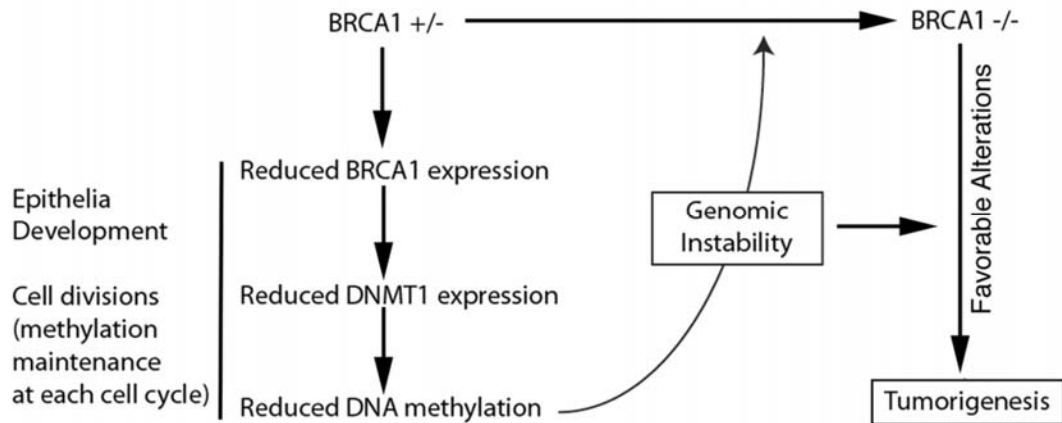

**Figure S9** An integrity model for a role of BRCA1 and DNMT1 in genomic stability and tumorigenesis. Women with only one remaining BRCA1 allele are at risk of reduced DNMT1 levels and subsequent higher genomic instability. In the long term, this instability increases the chances to lose the second functional BRCA1 allele, and enrich further genetic alterations, or epigenetic modification that facilitate breast or ovarian tumorigenesis.

## Supplementary Table S1 Primer information used in this study.

### ChIP assay primers for human DNMT1 promoter

| Position                             | Forward                       | Reverse                       |
|--------------------------------------|-------------------------------|-------------------------------|
| Human DNMT1 ChIP 1F/R<br>(351 - 896) | GGT TTG TGA GAG CCC<br>TTG AG | TCT CCC AGG CTG GAA<br>TGT AG |
| Human DNMT1 ChIP 2<br>(877 - 1458)   | CTA CAT TCC AGC CTG<br>GGA GA | GTG GAC TGC TTG AGG<br>CTA GG |
| Human DNMT1 ChIP 3<br>(1439 - 1970)  | CCT AGC CTC AAG CAG<br>TCC AC | AGG GAT CAC AAG<br>CAT GAA CC |
| Human DNMT1 ChIP 4<br>(1951 - 2463)  | GGT TCA TGC TTG TGA<br>TCC CT | ACC CAG CCC ATT TGC<br>TCA TT |
| Human DNMT1 ChIP 5<br>(2440 - 2843)  | AAT GAG CAA ATG<br>GGC TGG GT | CTG TTT CTC ATA GCA<br>GCT CC |

### ChIP assay primers for murine Dnmt1 promoter

|                                     |                               |                               |
|-------------------------------------|-------------------------------|-------------------------------|
| Mouse Dnmt1 ChIP 1<br>(7 - 506)     | GGT TGC AGA CGA<br>CAG AAC AG | GAT CCT CTG GCT TTT<br>GCA TT |
| Mouse Dnmt1 ChIP 2<br>(576 - 1093)  | ATG CCT GCA GTC CCT<br>TAC AC | AAG GGG AGG GGG<br>ATA GAG TT |
| Mouse Dnmt1 ChIP 3<br>(1085 - 1593) | CTC CCC TTG CTC ATC<br>TTT TG | GTG CGT GGG TAT GTG<br>ATG TC |
| Mouse Dnmt1 ChIP 4<br>(1548 - 2052) | TCT CCC TCT GAC CAT<br>GTG TG | ACT ACC GCT GGG CTC<br>TTC TC |
| Mouse Dnmt1 ChIP 5<br>(2094 - 2618) | GCG GAT TTC TGA GTT<br>CAA GG | CAA GAA ACC TGC CCA<br>TCT GT |

### Oligo sequences for biotinylated Dnmt1 promoter

|                  |                                                                                                            |                                                                                           |
|------------------|------------------------------------------------------------------------------------------------------------|-------------------------------------------------------------------------------------------|
| Biotin Dnmt1:1   | [Biotin~5]TGG GCT CGT<br>CCG TGC TGC GAC TGG<br>CGC CAC CCA CCT CCC<br>CCT TGC CTG AAG AGG<br>TGG C        | GCC ACC TCT TCA GGC<br>AAG GGG GAG GTG<br>GGT GGC GCC AGT CGA<br>AGC ACG GAC GAG<br>CCC A |
| Biotin Dnmt1 Mut | [Biotin~5]TGG CAT GCA<br>TGC ATT TGA TTC CAG<br>CAC TCA <b>GGG CAC</b><br><b>AAA</b> AGC CAG AGG<br>ATC TC | GAG ATC CTC TGG CTT<br>TTG TGC CCT GAG TGC<br>TGG AAT CAA ATG CAT<br>GCA TGC CA           |

RT-PCR primers for murine samples

| Gene           | Forward                              | Reverse                              |
|----------------|--------------------------------------|--------------------------------------|
| $\beta$ -actin | TGG AAT CCT GTG GCA<br>TCC ATG AAA C | TAA AAC GCA GCT CAG<br>TAA CAG TCC G |
| C-Fos          | TGG CCT CCC TGG ATT<br>TGA           | TTG CCT TCT CTG ACT<br>GCT CA        |
| C-Myc          | TGC GAC GAG GAA<br>GAG AAT TT        | GTG GAG AAG TTG<br>CGG TCA AT        |
| Vav1           | GTC CTC TTG TGC CAA<br>TTG CT        | TAC TTC TCC TCC GTC<br>TGC TG        |
| Ha-Ras         | CCA GCT GAT CCA GAA<br>CCA CT        | ACA GCA CAC ATT TGC<br>AGC TC        |
| C-Jun          | ACG GAC CGT TCT ATG<br>ACT GC        | AGT TGC TGA GGT TGG<br>CGT AG        |
| Brcal          | CTC AAG AAG CTG<br>GAG ATG AAG G     | CAA TAA ACT GCT GGT<br>CTC AGG       |
| Dnmt1          | GGC TTC AGT GGC ATG<br>AAC           | CTG CAG CCA AGA TGA<br>TGG           |
| Dnmt3a         | CCA TTC GAC CTG GTG<br>ATT GG        | TGG AGA CGT CTG TGT<br>AGT GG        |
| Dnmt3b         | GCG ACA ACC GTC CAT<br>TCT TC        | CTC TGG GCA CTG GCT<br>CTG ACC       |

Real time RT-PCR primers for murine samples

| Gene   | Forward                               | Reverse                              |
|--------|---------------------------------------|--------------------------------------|
| Brcal  | CGT GGG CTA CCG GAA<br>CC             | TCT TCA CTG ATC TCA<br>CGA TTC CA    |
| C-Fos  | TGG CCT CCC TGG ATT<br>TGA            | CCA CGT TGC TGA TGC<br>TCT TG        |
| C-Myc  | CTG GAT TTC CTT TGG<br>GCG TT         | TGG TGA AGT TCA CGT<br>TGA GGG       |
| Vav1   | CCT GTC TGC TCT GTC<br>ATG GA         | AAG CGC ATT AGG TCC<br>TCG TA        |
| Ha-Ras | CCA GCT GAT CCA GAA<br>CCA CT         | TGG TGT TGT TGA TGG<br>CAA AT        |
| C-Jun  | ACG GAC CGT TCT ATG<br>ACT GC         | GAC GTG AGA AGG<br>TCC GAG TT        |
| Dnmt1  | CCT AGT TCC GTG GCT<br>ACG AGG AGA A  | TCT CTC TCC TCT GCA<br>GCC GAC TCA   |
| Dnmt3a | GCC GAA TTG TGT CTT<br>GGT GGA TGA CA | CCT GGT GGA ATG CAC<br>TGC AGA AGG A |
| Dnmt3b | TTC AGT GAC CAG TCC<br>TCA GAC ACG AA | TCA GAA GGC TGG<br>AGA CCT CCC TCT T |

Real time RT-PCR primers for human samples

| Gene   | Forward                           | Reverse                           |
|--------|-----------------------------------|-----------------------------------|
| BRCA1  | CAG CTT GAC ACA GGT<br>TTG GAG    | GGC ATG AGT ATT TGT<br>GCC AC     |
| DNMT1  | TAC CTG GAC GAC CCT<br>GAC CTC    | CGT TGG CAT CAA AGA<br>TGG ACA    |
| DNMT3a | TAT TGA TGA GCG CAC<br>AAG AGA GC | GGG TGT TCC AGG GTA<br>ACA TTG AG |
| DNMT3b | GGC AAG TTC TCC GAG<br>GTC TCT G  | TGG TAC ATG GCT TTT<br>CGA TAG GA |

RT-PCR primers for human samples

| Gene   | Forward                           | Reverse                            |
|--------|-----------------------------------|------------------------------------|
| BRCA1  | CAG CTT GAC ACA GGT<br>TTG GAG    | GGC ATG AGT ATT TGT<br>GCC AC      |
| GAPDH  | ACA GCC GCA TCT TCT<br>TGT GC     | TTT GAT GTT AGA GGG<br>GTC TGC     |
| DNMT1  | GGT TCT TCC TCC TGG<br>AGA ATG TC | GTC TGG GCC ACG CCG<br>TAC TG      |
| DNMT3a | GAC GTC CGA AGC GTC<br>ACA CAG    | GCC ACC ACA TTC TCA<br>AAG AG      |
| DNMT3b | ACC ACC TGC TGA ATT<br>ACT CAC GC | GAT GGC ATC AAT CAT<br>CAC TGG ATT |

Primers for unmethylation murine samples

| Gene   | Forward                               | Reverse                               |
|--------|---------------------------------------|---------------------------------------|
| Ha-Ras | GCG ACC GGG GTG<br>AGC GTG CAA        | AGA GCC TCC ACC CTG<br>CAG CCT        |
| C-Jun  | GGG TTG TAA TAG TGT<br>GTT GGG AA     | CCC CTC CCC CTC ACA<br>ACA AA         |
| C-Fos  | AGG ATG TTT ATA TTA<br>GGA TAT TTG TG | CAA CAA AAA ATC<br>CAA AAA TAA ACA CT |
| C-Myc  | GGT TTT GTT GAT GTT<br>TGG TGG GA     | AAA AAA CAC TAT CCC<br>AAA TAA ACA    |
| Vav1   | TTT AGT GTA GGT GGA<br>GAA AGA TG     | TAA CTA AAA AAC<br>AAC ACC CAA CAC T  |

Primers for imprinting gene expression

| Gene   | Forward                  | Reverse                   |
|--------|--------------------------|---------------------------|
| Dcn    | CATACTCAAATAAGGCTTCACCAA | AAAGTTGTCTGTAGTTGTGAACTGA |
| Peg1   | GCTGCCGCGGTCCACAGTGTCG   | GTCACCCTTAGAGATGAGGTGGAC  |
| Peg3   | ATGTACCATCACGGAGACGACACC | CTCGGCATCCTGGGATCGAGACTC  |
| Cdkn1c | GCCTCAAACCCTTTCACCT      | CGTTACGGGTCCTCTGAT        |
| Tapal  | GAGGGCTGCACGAGGGGCTGCAC  | AGTACACGGAGCTGTTCCGG      |
| Sgce   | GGGGTGGCAGAGTGCCGCTTCC   | GGCAGCACATGATATAAGCGAG    |

siRNA oligo sequences

| Gene                                                 | Oligo Sequence                                               |
|------------------------------------------------------|--------------------------------------------------------------|
| Control siRNA                                        | 5' CUG CGA AGA AAG UGC GCC GUU<br>3'                         |
| BRCA1 siRNA                                          | 5' GAGAC AGUAA CUAAG CCAG TT<br>3' TT CUCUG UCAUU GAUUC GGUC |
| GFP shRNA                                            | pBS-U6-RNAi(GFP)                                             |
| Brca1 shRNA (Mixture of 2shRNA from Open Biosystems) | Catalog No. RMM1766-9105788<br>Catalog No. RMM1766-9106072   |
| Scrambled siRNA                                      | 5' GUC ACG AUA AGA CAA UGA<br>UAU 3'                         |
| BRCA1 siRNA#1                                        | 5' UCA CAG UGU CCU UUA UGU<br>AUU3'                          |
| BRCA1 siRNA #2                                       | 5' AAU GCC AAA GUA GCA AAU<br>GUA 3'                         |
